# Supplementary material for: A framework to assess the terrestrial risk of antibiotic resistance from antibiotics in slurry or manure amended soils
Source: Royal Society of Chemistry journal article supplement (doi:10.1039/d2va00306f), 2023-01-01
Supplement: d2va00306f1.pdf [file d2va00306f1.pdf]

## Supplementary Information

### A framework to assess the terrestrial risk of antibiotic resistance from antibiotics in slurry or manure amended soils.

Felicity C T Elder<sup>1\*</sup>, Alex J O'Neill<sup>2</sup>, Lisa M Collins<sup>3</sup>, Laura J Carter<sup>1</sup>

<sup>1</sup> School of Geography, Faculty of Environment, University of Leeds, United Kingdom

<sup>2</sup> School of Molecular and Cellular Biology, Faculty of Biological Sciences, University of Leeds

<sup>3</sup> School of Biology, Faculty of Biological Sciences, University of Leeds

Corresponding author: Felicity C T Elder, E-mail: [f.elder@leeds.ac.uk](mailto:f.elder@leeds.ac.uk)

#### **Table of Contents**

SI Table 1 Predicted No Effect Concentrations

SI Table 2 Literature Concentrations of Antibiotics in Farmyard Manure

SI Table 3 Tetracyclines – Predicted Environmental Concentrations Pore Water

SI Table 5 Sulfonamides and Lincosamides– Predicted Environmental Concentrations Pore Water

#### **SI Table 1 Predicted No Effect Concentrations (1)**

| Antibiotic             | PNEC environment ( $\mu\text{g.L}^{-1}$ ) | PNEC resistance ( $\mu\text{g.L}^{-1}$ ) |
|------------------------|-------------------------------------------|------------------------------------------|
| Tetracyclines          |                                           |                                          |
| Tetracycline (TET)     | 3.2                                       | 1                                        |
| Oxytetracycline (OXY)  | 18                                        | 0.5                                      |
| Fluoroquinolones       |                                           |                                          |
| Ciprofloxacin (CIPRO)  | 0.45                                      | 0.06                                     |
| Enrofloxacin (ENRO)    | 1.9                                       | 0.06                                     |
| Sulfonamides           |                                           |                                          |
| Sulfamethoxazole (SMZ) | NA                                        | NA                                       |
| Lincosamides           |                                           |                                          |
| Lincomycin (LINCO)     | 1.8                                       | 2                                        |

**SI Table 2** Literature Concentrations of Antibiotics in Farmyard Manure (FYM)

| Antibiotic               | Slurry Conc.<br>(mg Kg <sup>-1</sup> ) | FYM type       | Reference                       |
|--------------------------|----------------------------------------|----------------|---------------------------------|
| Tetracyclines            |                                        |                |                                 |
| Tetracycline<br>(TET)    | 0.45                                   | Calf slurry    | Huygens et al, 2021(2)          |
|                          | 0.16                                   | Pig slurry     | Rasschaert et al, 2020 (3)      |
|                          | 12.10                                  | Pig slurry     | Qiao et al, 2012(4)             |
|                          | 16.00                                  | Pig slurry     | Gros et al, 2019(5)             |
|                          | 43.50                                  | manure         | Hu et al, 2010(6)               |
|                          | 300.0                                  | Pig slurry     | Widyasari-Mehta et al, 2016 (7) |
|                          | 227.0                                  | Pig slurry     | Widyasari-Mehta et al, 2016 (7) |
|                          | 5.90                                   | Pig slurry     | Widyasari-Mehta et al, 2016 (7) |
| Oxytetracycline<br>(OXY) | 40.78                                  | Calf slurry    | Huygens et al, 2021(2)          |
|                          | 4.819                                  | Pig slurry     | Rasschaert et al, 2020 (3)      |
|                          | 770.0                                  | Pig slurry     | Gros et al, 2019(5)             |
|                          | 75.29                                  | Pig slurry     | Gros et al, 2019(5)             |
|                          | 34.23                                  | Pig slurry     | Gros et al, 2019(5)             |
|                          | 183.5                                  | manure         | Hu et al, 2010(6)               |
|                          | 211                                    | Pig slurry     | Widyasari-Mehta et al, 2016 (7) |
|                          | 58.27                                  | Pig slurry     | Huygens et al, 2021(5)          |
| Fluoroquinolones         |                                        |                |                                 |
| Ciprofloxacin<br>(CIPRO) | 0.48                                   | Calf slurry    | Huygens et al, 2021(2)          |
|                          | 0.06                                   | Pig slurry     | Huygens et al, 2021(3)          |
|                          | 8.80                                   | Pig slurry     | Gros et al, 2019(5)             |
|                          | 34.00                                  | Pig slurry     | Gros et al, 2019(5)             |
|                          | 43.00                                  | manure         | Hu et al, 2010(6)               |
| Enrofloxacin<br>(ENRO)   | 0.31                                   | Calf slurry    | Huygens et al, 2021(2)          |
|                          | 0.14                                   | Pig slurry     | Rasschaert et al, 2020(3)       |
|                          | 60.21                                  | Pig slurry     | Gros et al, 2019(5)             |
|                          | 53.00                                  | Pig slurry     | Gros et al, 2019(5)             |
|                          | 4.70                                   | Pig slurry     | Widyasari-Mehta et al, 2016 (7) |
| Sulfonamides             |                                        |                |                                 |
| Sulfamethazine<br>(SMZ)  | 0.03                                   | Calf slurry    | Huygens et al, 2021(2)          |
|                          | 0.458                                  | Pig slurry     | Gros et al, 2019(5)             |
|                          | 3.0                                    | Pig slurry     | Van den Meersche et al, 2016(8) |
|                          | 4.9                                    | Pig manure     | Ji et al, 2012(9)               |
|                          | 7.3                                    | Pig manure     | Hu et al, 2010(6)               |
|                          | 4.6                                    | Cattle manure  | Ji et al, 2012(9)               |
|                          | 8.0                                    | Chicken manure | Ho et al, 2014 (10)             |
| 5.8                      | Chicken manure                         |                |                                 |
| Lincosamides             |                                        |                |                                 |
| Lincomycin<br>(LINCOO)   | 0.36                                   | Calf slurry    | Huygens et al, 2021(2)          |
|                          | 1.767                                  | Pig slurry     | Rasschaert et al, 2020(3)       |
|                          | 227                                    | Pig slurry     | Gros et al, 2019(5)             |
|                          | 97.8                                   | Pig slurry     | Kuchta and Cessna, 2009(11)     |
|                          | 3.8                                    | manure         | Hu et al, 2010(6)               |

**SI Table 3** Tetracyclines – Predicted Environmental Concentrations Pore Water

Equ.2 – Droge and Goss (2013)(12)

Equ.3 – Franco et al (2009)(13).

| Soil pH                      | % Ionised | Model | $K_d$ (L.Kg <sup>-1</sup> ) | FYM conc (mg.kg-1) | Non-Ploughed       |                            |           | Ploughed           |                            |          |
|------------------------------|-----------|-------|-----------------------------|--------------------|--------------------|----------------------------|-----------|--------------------|----------------------------|----------|
|                              |           |       |                             |                    | PEC soil (µg.kg-1) | PEC <sub>PW</sub> (µg.L-1) | RQ        | PEC soil (µg.kg-1) | PEC <sub>PW</sub> (µg.L-1) | RQ       |
| <b>Tetracycline (TET)</b>    |           |       |                             |                    |                    |                            |           |                    |                            |          |
| 8.7                          | 66.86     | Equ.3 | 0.0007                      | 0.45               | 0.1                | 21.54                      | 21.54     | 0.02               | 4.31                       | 4.31     |
| 5                            | 37.75     | Equ.2 | 5958.22                     |                    |                    | 2.56E-05                   | 2.57E-05  |                    | 5.14E-06                   | 5.14E-06 |
| 8.7                          | 66.86     | Equ.3 | 0.0007                      | 0.16               | 0.036              | 7.71                       | 7.71      | 0.007              | 1.54                       | 1.54     |
| 5                            | 37.75     | Equ.2 | 5958.22                     |                    |                    | 9.18E-06                   | 9.19E-06  |                    | 1.84E-06                   | 1.84E-06 |
| 8.7                          | 66.86     | Equ.3 | 0.0007                      | 12.1               | 2.74               | 579.08                     | 597.08    | 0.55               | 115.82                     | 115.82   |
| 5                            | 37.75     | Equ.2 | 5958.22                     |                    |                    | 6.9E-04                    | 6.90E-04  |                    | 1.38E-04                   | 1.38E-04 |
| 8.7                          | 66.86     | Equ.3 | 0.0007                      | 16                 | 3.62               | 765.73                     | 765.73    | 0.73               | 153.15                     | 153.15   |
| 5                            | 37.75     | Equ.2 | 5958.22                     |                    |                    | 9.13E-04                   | 9.13E-04  |                    | 1.83E-04                   | 1.83E-04 |
| 8.7                          | 66.86     | Equ.3 | 0.0007                      | 43.5               | 9.86               | 2081.82                    | 2001.82   | 1.97               | 416.36                     | 416.36   |
| 5                            | 37.75     | Equ.2 | 5958.22                     |                    |                    | 2.48E-03                   | 2.48E-03  |                    | 4.96E-04                   | 4.96E-04 |
| 8.7                          | 66.86     | Equ.3 | 0.0007                      | 300                | 68.0               | 14357.41                   | 14357.41  | 13.6               | 2871.48                    | 2871.48  |
| 5                            | 37.75     | Equ.2 | 5958.22                     |                    |                    | 1.71E-02                   | 1.71E-02  |                    | 3.42E-03                   | 3.42E-03 |
| 8.7                          | 66.86     | Equ.3 | 0.0007                      | 227                | 51.45              | 10863.77                   | 10863.77  | 10.29              | 2172.75                    | 2172.75  |
| 5                            | 37.75     | Equ.2 | 5958.22                     |                    |                    | 1.29E-05                   | 1.30E-02  |                    | 2.59E-03                   | 2.59E-03 |
| 8.7                          | 66.86     | Equ.3 | 0.0007                      | 5.9                | 1.34               | 282.36                     | 282.36    | 0.27               | 56.47                      | 56.47    |
| 5                            | 37.75     | Equ.2 | 5958.22                     |                    |                    | 3.36E-04                   | 3.37E-04  |                    | 6.73E-05                   | 6.73E-05 |
| <b>Oxytetracycline (OXY)</b> |           |       |                             |                    |                    |                            |           |                    |                            |          |
| 8.7                          | 74.67     | Equ.3 | 0.0002                      | 40.78              | 9.24               | 6770.30                    | 13540.60  | 1.85               | 1354.06                    | 2708.12  |
| 5                            | 32.89     | Equ.2 | 6172.00                     |                    |                    | 0.0023                     | 4.49E-03  |                    | 4.49E-04                   | 8.99E-04 |
| 8.7                          | 74.67     | Equ.3 | 0.0002                      | 4.82               | 1.09               | 800.05                     | 1600.10   | 0.22               | 160.01                     | 320.02   |
| 5                            | 32.89     | Equ.2 | 6172.00                     |                    |                    | 0.0003                     | 5.31E-04  |                    | 5.31E-05                   | 1.06E-04 |
| 8.7                          | 74.67     | Equ.3 | 0.0002                      | 770                | 174.53             | 127835.45                  | 255670.89 | 34.91              | 25567.09                   | 51134.18 |
| 5                            | 32.89     | Equ.2 | 6172.00                     |                    |                    | 0.0424                     | 0.085     |                    | 8.48E-03                   | 0.017    |
| 8.7                          | 74.67     | Equ.3 | 0.0002                      | 75.29              | 17.07              | 12499.65                   | 24999.30  | 3.41               | 2499.93                    | 4.999.86 |
| 5                            | 32.89     | Equ.2 | 6172.00                     |                    |                    | 0.0042                     | 8.30E-03  |                    | 8.30E-04                   | 1.66E-03 |
| 8.7                          | 74.67     | Equ.3 | 0.0002                      | 34.23              | 7.76               | 5682.87                    | 11365.73  | 1.55               | 1136.57                    | 2273.15  |
| 5                            | 32.89     | Equ.2 | 6172.00                     |                    |                    | 0.0019                     | 3.77E-03  |                    | 3.77E-04                   | 7.54E-04 |
| 8.7                          | 74.67     | Equ.3 | 0.0002                      | 183.5              | 41.59              | 30464.68                   | 60929.36  | 8.32               | 6092.94                    | 12185.87 |
| 5                            | 32.89     | Equ.2 | 6172.00                     |                    |                    | 0.0101                     | 2.02E-02  |                    | 2.02E03                    | 4.04E-03 |
| 8.7                          | 74.67     | Equ.3 | 0.0002                      | 211                | 47.82              | 35030.23                   | 70060.47  | 9.57               | 7006.05                    | 14012.09 |
| 5                            | 32.89     | Equ.2 | 6172.00                     |                    |                    | 0.0116                     | 2.33E-02  |                    | 2.32E-03                   | 4.65E-05 |
| 8.7                          | 66.86     | Equ.3 | 0.0002                      | 58.27              | 13.21              | 9673.99                    | 19347.98  | 2.64               | 1934.80                    | 3869.60  |
| 5                            | 37.75     | Equ.2 | 6172.00                     |                    |                    | 0.00321                    | 6.42E-03  |                    | 6.42E-04                   | 1.28E-05 |

**SI Table 4** Fluoroquinolones– Predicted Environmental Concentrations Pore Water

Equ.2 – Droge and Goss (2013)(12)

Equ.3 – Franco et al (2009)(13).

| Soil pH                      | % Ionised | Model | $K_d$ (L.Kg <sup>-1</sup> ) | FYM conc (mg.kg <sup>-1</sup> ) | Non-Ploughed       |                            |          | Ploughed           |                            |          |
|------------------------------|-----------|-------|-----------------------------|---------------------------------|--------------------|----------------------------|----------|--------------------|----------------------------|----------|
|                              |           |       |                             |                                 | PEC soil (µg.Kg-1) | PEC <sub>PW</sub> (µg.L-1) | RQ       | PEC soil (µg.Kg-1) | PEC <sub>PW</sub> (µg.L-1) | RQ       |
| <b>Ciprofloxacin (CIPRO)</b> |           |       |                             |                                 |                    |                            |          |                    |                            |          |
| 8.7                          | 70.79     | Equ.3 | 0.26                        | 0.48                            | 0.11               | 0.63                       | 10.55    | 0.02               | 0.13                       | 2.11     |
| 5                            | 2.24      | Equ.2 | 5038.76                     |                                 |                    | 3.24E-05                   | 5.40E-04 |                    | 6.48E-06                   | 1.08E-04 |
| 8.7                          | 70.79     | Equ.3 | 0.26                        | 0.06                            | 0.003              | 0.08                       | 1.38     | 0.003              | 0.02                       | 0.28     |
| 5                            | 2.24      | Equ.2 | 5038.76                     |                                 |                    | 4.25E-06                   | 7.09E-05 |                    | 8.50E-07                   | 1.42E-05 |
| 8.7                          | 70.79     | Equ.3 | 0.26                        | 8.8                             | 1.99               | 11.60                      | 198.38   | 0.04               | 2.32                       | 38.68    |
| 5                            | 2.24      | Equ.2 | 5038.76                     |                                 |                    | 5.94E-04                   | 9.88E-03 |                    | 1.19E-04                   | 1.98E-03 |
| 8.7                          | 70.79     | Equ.3 | 0.26                        | 34                              | 7.71               | 44.83                      | 747.16   | 1.54               | 8.97                       | 149.43   |
| 5                            | 2.24      | Equ.2 | 5038.76                     |                                 |                    | 2.29E-03                   | 8.83E-02 |                    | 4.59E-04                   | 7.65E03  |
| 8.7                          | 70.79     | Equ.3 | 0.041                       | 90                              | 20.4               | 118.67                     | 1977.79  | 4.08               | 23.73                      | 395.56   |
| 5                            | 2.24      | Equ.2 | 5038.76                     |                                 |                    | 6.07E-03                   | 1.01E-01 |                    | 1.21E-03                   | 2.02E-02 |
| <b>Enrofloxacin (ENRO)</b>   |           |       |                             |                                 |                    |                            |          |                    |                            |          |
| 8.7                          | 92.9      | Equ.3 | 5.73                        | 0.31                            | 0.07               | 0.02                       | 0.31     | 0.01               | 3.68E-03                   | 0.06     |
| 5                            | 3.82      | Equ.2 | 6434.84                     |                                 |                    | 1.63E-05                   | 2.73E-04 |                    | 2.28E-06                   | 5.46E-05 |
| 8.7                          | 92.9      | Equ.3 | 5.73                        | 0.142                           | 0.03               | 0.01                       | 0.14     | 6.44E-03           | 1.69E-03                   | 0.03     |
| 5                            | 3.82      | Equ.2 | 6434.84                     |                                 |                    | 7.5E-06                    | 1.25E-04 |                    | 1.5E-06                    | 2.50E-05 |
| 8.7                          | 92.9      | Equ.3 | 5.73                        | 60.21                           | 13.65              | 3.57                       | 59.57    | 2.73               | 0.71                       | 11.91    |
| 5                            | 3.82      | Equ.2 | 6434.84                     |                                 |                    | 3.18E-03                   | 5.30E-02 |                    | 6.36E-04                   | 1.06E-02 |
| 8.7                          | 92.9      | Equ.3 | 5.73                        | 53                              | 12.01              | 3.15                       | 52.43    | 2.4                | 0.63                       | 10.49    |
| 5                            | 3.82      | Equ.2 | 6434.84                     |                                 |                    | 2.8E-03                    | 4.67E-02 |                    | 5.6E-04                    | 9.34E-03 |
| 8.7                          | 92.9      | Equ.3 | 5.73                        | 4.7                             | 1.07               | 0.28                       | 4.65     | 0.21               | 0.06                       | 0.93     |
| 5                            | 3.82      | Equ.2 | 6434.84                     |                                 |                    | 2.48E-04                   | 4.14E-03 |                    | 4.97E-05                   | 8.28E-04 |

**SI Table 5 Sulfonamides and Lincosamides– Predicted Environmental Concentrations Pore Water**

Equ.2 – Droge and Goss (2013)(12)

Equ.3 – Franco et al (2009)(13).

\*RQ calculated using PNECr for sulfamethoxazole.

| Soil pH                     | % Ionised    | Model          | $K_d$ (L.Kg <sup>-1</sup> ) | FYM conc (mg.kg <sup>-1</sup> ) | Non-Ploughed                    |                                         |           | Ploughed                        |                                         |           |
|-----------------------------|--------------|----------------|-----------------------------|---------------------------------|---------------------------------|-----------------------------------------|-----------|---------------------------------|-----------------------------------------|-----------|
|                             |              |                |                             |                                 | PEC soil (µg.Kg <sup>-1</sup> ) | PEC <sub>PW</sub> (µg.L <sup>-1</sup> ) | RQ        | PEC soil (µg.Kg <sup>-1</sup> ) | PEC <sub>PW</sub> (µg.L <sup>-1</sup> ) | RQ        |
| <b>Sulfamethazine (SMZ)</b> |              |                |                             |                                 |                                 |                                         |           |                                 |                                         |           |
| 8.7<br>5                    | 97.10<br>50  | Equ.3<br>NA    | 8.57<br>NA                  | 0.45                            | 6.8E-03                         | 0.001<br>NA                             | 7.43E-05* | 0.001                           | 0.0002<br>NA                            | 1.49E-05* |
| 8.7<br>5                    | 97.10<br>50  | Equ.3<br>NA    | 8.57<br>NA                  | 0.46                            | 0.1                             | 0.018<br>NA                             | 1.14E-03* | 0.021                           | 0.004<br>NA                             | 2.27E-04* |
| 8.7<br>5                    | 97.10<br>50  | Equ.3<br>NA    | 8.57<br>NA                  | 3.0                             | 0.68                            | 0.119<br>NA                             | 7.43E-03* | 0.136                           | 0.024<br>NA                             | 1/49E-03* |
| 8.7<br>5                    | 97.10<br>50  | Equ.3<br>NA    | 8.57<br>NA                  | 4.9                             | 1.11                            | 0.194<br>NA                             | 1.21E-02* | 0.222                           | 0.039<br>NA                             | 2.43E-03* |
| 8.7<br>5                    | 97.10<br>50  | Equ.3<br>NA    | 8.57<br>NA                  | 7.3                             | 1.65                            | 0.289<br>NA                             | 1.81E-02* | 0.331                           | 0.058<br>NA                             | 3.62E-03* |
| 8.7<br>5                    | 97.10<br>50  | Equ.3<br>NA    | 8.57<br>NA                  | 4.6                             | 1.04                            | 0.182<br>NA                             | 1.14E-02* | 0.209                           | 0.036<br>NA                             | 2.28E-03* |
| 8.7<br>5                    | 97.10<br>50  | Equ.3<br>NA    | 8.57<br>NA                  | 8.0                             | 1.81                            | 0.317<br>NA                             | 1.98E-02* | 0.363                           | 0.063<br>NA                             | 3.96E-03* |
| 8.7<br>5                    | 97.10<br>50  | Equ.3<br>NA    | 8.57<br>NA                  | 5.8                             | 1.31                            | 0.230<br>NA                             | 1.44E-02* | 0.263                           | 0.046<br>NA                             | 2.87E-03* |
| <b>Lincomycin (LINCO)</b>   |              |                |                             |                                 |                                 |                                         |           |                                 |                                         |           |
| 8.7<br>5                    | 22.7<br>0.01 | Equ.2<br>Equ.2 | 7818.34                     | 0.36                            | 0.08                            | 1.57E-05                                | 7.83E-06  | 0.016                           | 3.13E-06                                | 1.56E-06  |
| 8.7<br>5                    | 22.7<br>0.01 | Equ.2<br>Equ.2 | 7818.34                     | 1.77                            | 0.4                             | 7.68E-05                                | 3.84E-05  | 0.08                            | 1.54E-05                                | 7.68E-06  |
| 8.7<br>5                    | 22.7<br>0.01 | Equ.2<br>Equ.2 | 7818.34                     | 227                             | 51.45                           | 9.87E-03                                | 4.94E-03  | 10.291                          | 1.97E-03                                | 9.87E-04  |
| 8.7<br>5                    | 22.7<br>0.01 | Equ.2<br>Equ.2 | 7818.34                     | 3.8                             | 0.86                            | 1.65E-04                                | 8.26E-05  | 0.172                           | 3.31E-05                                | 1.65E-05  |

## References

1. AMR Industry Alliance. AMR Industry Alliance Antibiotic Discharge Targets -List of Predicted No-Effect Concentrations (PNECs)-. 2018;(October 2000):1–5. Available from: [https://www.amrindustryalliance.org/wp-content/uploads/2018/09/AMR\\_Industry\\_Alliance\\_List-of-Predicted-No-Effect-Concentrations-PNECs.pdf](https://www.amrindustryalliance.org/wp-content/uploads/2018/09/AMR_Industry_Alliance_List-of-Predicted-No-Effect-Concentrations-PNECs.pdf)
2. Huygens J, Daeseleire E, Mahillon J, Van Elst D, Decrop J, Meirlaen J, et al. Presence of antibiotic residues and antibiotic resistant bacteria in cattle manure intended for fertilization of agricultural fields: A one health perspective. *Antibiotics*. 2021;10(4).
3. Rasschaert G, Van Elst D, Colson L, Herman L, Ferreira HC de C, Dewulf J, et al. Antibiotic residues and antibiotic-resistant bacteria in pig slurry used to fertilize agricultural fields. *Antibiotics*. 2020;9(1).
4. Qiao M, Chen W, Su J, Zhang B, Zhang C. Fate of tetracyclines in swine manure of three selected swine farms in China. *J Environ Sci (China)* [Internet]. 2012;24(6):1047–52. Available from: [http://dx.doi.org/10.1016/S1001-0742\(11\)60890-5](http://dx.doi.org/10.1016/S1001-0742(11)60890-5)
5. Gros M, Mas-Pla J, Boy-Roura M, Geli I, Domingo F, Petrović M. Veterinary pharmaceuticals and antibiotics in manure and slurry and their fate in amended agricultural soils: Findings from an experimental field site (Baix Empordà, NE Catalonia). *Sci Total Environ*. 2019;654:1337–49.
6. Hu X, Zhou Q, Luo Y. Occurrence and source analysis of typical veterinary antibiotics in manure, soil, vegetables and groundwater from organic vegetable bases, northern China. *Environ Pollut* [Internet]. 2010;158(9):2992–8. Available from: <http://dx.doi.org/10.1016/j.envpol.2010.05.023>
7. Widiasari-Mehta A, Hartung S, Kreuzig R. From the application of antibiotics to antibiotic residues in liquid manures and digestates: A screening study in one European center of conventional pig husbandry. *J Environ Manage* [Internet]. 2016;177:129–37. Available from: <http://dx.doi.org/10.1016/j.jenvman.2016.04.012>
8. Van den Meersche T, Pamel E Van, Poucke C Van, Herman L, Heyndrickx M, Rasschaert G, et al. Development, validation and application of an ultra high performance liquid chromatographic-tandem mass spectrometric method for the simultaneous detection and quantification of five different classes of veterinary antibiotics in swine manure. *J Chromatogr A* [Internet]. 2016;1429:248–57. Available from: <http://dx.doi.org/10.1016/j.chroma.2015.12.046>
9. Ji X, Shen Q, Liu F, Ma J, Xu G, Wang Y, et al. Antibiotic resistance gene abundances associated with antibiotics and heavy metals in animal manures and agricultural soils adjacent to feedlots in Shanghai; China. *J Hazard Mater* [Internet]. 2012;235–236:178–85. Available from: <http://dx.doi.org/10.1016/j.jhazmat.2012.07.040>
10. Ho Y Bin, Zakaria MP, Latif PA, Saari N. Occurrence of veterinary antibiotics and progesterone in broiler manure and agricultural soil in Malaysia. *Sci Total Environ* [Internet]. 2014;488–489(1):261–7. Available from: <http://dx.doi.org/10.1016/j.scitotenv.2014.04.109>
11. Kuchta SL, Cessna AJ. Lincomycin and spectinomycin concentrations in liquid swine manure

- and their persistence during simulated manure storage. *Arch Environ Contam Toxicol.* 2009;57(1):1–10.
12. Droge STJ, Goss KU. Development and evaluation of a new sorption model for organic cations in soil: Contributions from organic matter and clay minerals. *Environ Sci Technol.* 2013;47(24):14233–41.
  13. Franco A, Fu W, Trapp S. Influence of soil pH on the sorption of ionizable chemicals: Modeling advances. *Environ Toxicol Chem.* 2009;28(9):2018.
